# Supplementary material for: Prevalence of self-reported eczema in relation to living environment, socio-economic status and respiratory symptoms assessed in a questionnaire study
Source: Springer Nature journal article supplement (doi:10.1186/1471-5945-3-4), 2003-07-15
Supplement: Additional file 2 [file 1471-5945-3-4-s2.doc]

##### Appendix 2

#### **Questions about the lung**

1. Have any of your parents, brothers or sisters, or children had:
2. Asthma
3. Allergic eye-/nose catarrh (hay-fever)
4. Chronic bronchitis or emphysema
5. Allergic eczema

2. Have you now, or have you had, any of the following diseases:

1. Asthma
2. Allergic eye/nose catarrh (hay-fever)
3. Chronic bronchitis or emphysema
4. Any other lung or airways disease
5. If yes, which? _______________________
6. Allergic eczema
7. Have you been diagnosed by a doctor as having asthma?

4. Have you been diagnosed by a doctor as having chronic bronchitis (bronchitis) or

emphysema?

1. Do you currently use asthma medicines (permanently or as needed)?

If yes:

1. As needed
2. Permanently
3. I use inhaled steroids every day (Pulmicort or Becotide)

1. Have you had asthma symptoms during the last 12 months i.e. intermittent or attacks of breathlessness? The symptoms may exist simultaneously with or without cough or wheezing?
2. Have you had long-standing cough during the last years?
3. Do you usually have phlegm when coughing, or do you have phlegm on your chest which is difficult to bring up?

If yes:

1. Do you bring up phlegm when coughing on most days during periods of at least three months?
2. Have you had such periods during at least two successive years?
3. Have you wheezing, whistling or a noisy sound in your chest when breathing?
4. Do you usually have breathlessness, wheeze or severe cough:
5. During exertion
6. in cold weather
7. in misty / foggy weather
8. in dusty places
9. from cigarette or tobacco smoke
10. from car exhaust fumes / in towns
11. from strong smelling scents e.g. perfumes, spices, cleaner, printing ink etc.
12. from pollen e.g. birch, grass
13. from furred animals
14. from stress
15. Have you during the last 12 months awakened due to cough, breathlessness or “tightness” in your chest?
16. How would you characterise your breathing?
17. I very seldom have problems with my breathing.
18. Occasionally I have problems when breathing.
19. My breathing is never quite well.
20. Do you smoke? (smokers also include those who smoke a few cigarettes or pipe fills a week, and those who have stopped smoking during the last year)

If yes:

How many cigarettes do you smoke per day?

1. Less than 5
2. 5-14
3. 15 or more

If no:

1. Have you been a smoker but stopped smoking more than a year ago?
2. Does anyone else in your family smoke?
3. Do you live close to a road with heavy traffic?
4. What is your current work/occupation?
5. How many years have you been working in this occupation?
6. If you have had another job/occupation for at least 5 years, please state what:
7. How many years have you been living in the Malmöhus county?

###### Questions about the nose

Answer with a cross at the relevant line if no other instructions are given.

1 How often do you have nasal symptoms? Please tick one alternative.

1. I never or very seldom have disturbing nasal symptoms
2. I have recurrent disturbing nasal symptoms
3. I have permanent disturbing nasal symptoms

If you have answered b or c to the above question please continue to answer the questionnaire

1. When you have nasal symptoms, which symptom or symptoms do you have. Please tick one or more alternatives.

1. Watery nasal discharge
2. Thick yellow nasal discharge
3. A blocked nose
4. Sneezing
5. Itching
6. Any other symptom (please notify which ----------------------------)
7. When during the year do you have nasal symptoms and how often during those periods? (Please tick one alternative during each season.)

Spring

A 1. Daily during at least one week

2. One or several times a week

3. Occasional times a month

4. I have no symptoms during this period

Summer

B 1. Daily during at least one week

2. One or several times a week

3. Occasional times a month

4. I have no symptoms during this period

Autumn

C 1. Daily during at least one week

2. One or several times a week

3. Occasional times a month

4. I have no symptoms during this period

Winter

D 1. Daily during at least one week

2. One or several times a week

3. Occasional times a month

4. I have no symptoms during this period

1. Are the nasal symptoms provoked or worsened by environmental factors? If yes tick the

appropriate box or boxes below.

Yes No

1. Tree-pollen (e,g. birch)
2. Grass-pollen (e.g. grass)
3. Animals (please state which ……………..)
4. House dust
5. Mould
6. Damp and/or cold air
7. Dry air
8. Tobacco fumes
9. Strong-smelling scents (e.g. perfumes)
10. Spicy food
11. Red wine
12. Other food (please state which ……………..)
13. Stress or discomfort
14. Something else (please state what ……………..)

1. How often are the nasal symptoms associated with symptoms from the eyes (itching, redness and or increased tear production)? Please tick one alternative.
2. Often
3. Sometimes
4. Never

1. How often are the nasal symptoms associated with symptoms from the lungs (cough, breathlessness and/or wheezing)? Please tick one alternative.
2. Often
3. Sometimes
4. Never
